# Supplementary material for: Transient Interphase Microtubules Appear in Differentiating Sponge Cells
Source: MDPI journal article supplement (doi:10.3390/cells13090736), 2024-04-24
Supplement: s1 [file s1]

# Supplemental Table 1.

Accession numbers for protein sequences of genes in *H. dujardinii*, mentioned in the article and accession numbers to their homologs / best blastp hits in *H. sapiens* and *A. queenslandica*.

| Protein name     | <i>H. dujardinii</i> | Homologs / best blastp hits |                  |                         |                  |
|------------------|----------------------|-----------------------------|------------------|-------------------------|------------------|
|                  |                      | <i>H. sapiens</i>           |                  | <i>A. queenslandica</i> |                  |
|                  |                      | AN                          | Percent identity | AN                      | Percent identity |
| tubulin alpha 1  | MT451960             | NP_005992.1                 | 96.53%           | XP_003387184.1          | 81.94%           |
| tubulin alpha 2  | MT451961             | NP_005992.1                 | 96.76%           | XP_003387184.1          | 81.71%           |
| tubulin alpha 3  | MT451962             | NP_005992.1                 | 95.83%           | XP_003387184.1          | 81.48%           |
| tubulin alpha 4  | MT451963             | NP_005992.1                 | 96.53%           | XP_003387184.1          | 81.94%           |
| tubulin alpha 5  | MT451964             | NP_005992.1                 | 98.86%           | XP_003387184.1          | 82.99%           |
| tubulin alpha 6  | MT451965             | NP_116093.1                 | 86.38%           | XP_003387185.1          | 77.61%           |
| tubulin alpha 7  | MT451966             | NP_116093.1                 | 86.61%           | XP_003387184.1          | 78.22%           |
| tubulin alpha 8  | MT451967             | NP_116093.1                 | 87.11%           | XP_003387185.1          | 77.11%           |
| tubulin alpha 9  | MT451968             | NP_116093.1                 | 79.78%           | XP_003387184.1          | 76.17%           |
| tubulin alpha 10 | OM982448             | NP_005992.1                 | 95.00%           | XP_003387184.1          | 81.18%           |
| tubulin beta     | OM892945             | NP_006079.1                 | 99.53%           | XP_003383793.1          | 99.53%           |
| tubulin gamma 1  | OM892946             | NP_001061.2                 | 82.56%           | XP_003382700.2          | 77.02%           |
| tubulin gamma 2  | OM892947             | NP_001243821.1              | 50.92%           | XP_003383149.1          | 55.90%           |
| tubulin epsilon  | OM892948             | NP_057346.1                 | 62.82%           | XP_019850502.1          | 65.15%           |
| tubulin zeta     | OM892949             | NP_057345.2                 | 26.24%           | XP_003386726.1          | 28.47%           |
| tubulin delta    | OM892950             | AAF09584.1                  | 40.60%           | XP_003383204.1          | 39.70%           |
|                  |                      |                             |                  |                         |                  |
| dynactin 1       | OM982405             | AAH71583.1                  | 36.92%           | XP_003384705.1          | 41.57%           |
| dynactin 2       | OM982406             | NP_001248342.1              | 30.71%           | XP_019864101.1          | 30.16%           |
| dynactin 3       | OM982407             | no                          |                  | no                      |                  |
| dynactin 4       | OM982408             | AAH26323.1                  | 31.16%           | XP_003388453.1          | 29.73%           |

|                                                  |          |                |        |                |        |
|--------------------------------------------------|----------|----------------|--------|----------------|--------|
| dynactin 5                                       | OM982409 | NP_115875.1    | 59.66% | XP_003384508.1 | 58.76% |
| dynactin 6                                       | OM982410 | NP_006562.1    | 42.93% | XP_003389093.1 | 47.59% |
| centrin 1/2                                      | OM982411 | NP_004057.1    | 79.87% | XP_003388306.1 | 81.88% |
| centrin 3                                        | OM982412 | CAA73077.1     | 74.67% | XP_003382926.1 | 69.54% |
| CKAP5/XMAP215                                    | OM982413 | AAI11044.1     | 49.31% | XP_019850158.1 | 50.30% |
| CLASP 1/2                                        | OM982414 | XP_016859180.1 | 35.68% | XP_019850114.1 | 32.88% |
| pericentrin/AKAP9 homolog                        | OM982415 | no             |        | XP_019850232.1 | 35.00% |
| cytoplasmic dynein 1 heavy chain 1               | OM982416 | XP_011404630.2 | 68.93% | NP_001367.2    | 63.66% |
| cytoplasmic dynein 2 heavy chain 1               | OM982417 | XP_003386043.3 | 53.87% | NP_001368.2    | 51.14% |
| axonemal dynein heavy chain 1                    | OM982418 | NP_056327.4    | 63.02% | XP_019856273.1 | 70.20% |
| axonemal dynein light intermediate polypeptide 1 | OM982419 | NP_003453.3    | 66.54% | XP_003386434.1 | 70.99% |
| axonemal dynein heavy chain 3                    | OM982420 | XP_011544184.1 | 61.76% | XP_011544184.1 | 61.76% |
| axonemal dynein heavy chain 6                    | OM982421 | NP_001361.1    | 59.46% | XP_011404792.2 | 69.45% |
| axonemal dynein heavy chain 7                    | OM982422 | AAL37427.1     | 64.35% | XP_019854280.1 | 76.59% |
| axonemal dynein heavy chain 10                   | OM982423 | NP_001359035.1 | 60.41% | XP_019853009.1 | 68.34% |
| axonemal dynein heavy chain A                    | OM982425 | NP_001193856.1 | 60.47% | XP_019857825.1 | 68.02% |
| axonemal dynein heavy chain B                    | OM982426 | EAX08050.1     | 60.94% | XP_011403213.1 | 66.15% |
| axonemal dynein heavy chain C                    | OM982427 | XP_005248319.2 | 61.72% | XP_011403213.1 | 68.54% |
| axonemal dynein heavy chain D                    | OM982428 | NP_775899.3    | 62.58% | XP_019853072.1 | 70.92% |

|                                             |          |                |        |                |        |
|---------------------------------------------|----------|----------------|--------|----------------|--------|
| axonemal dynein heavy chain reconstructed 2 | OM982429 | XP_016865816.1 | 27.73% | XP_019856560.1 | 33.97% |
| dynein-1-beta heavy chain                   | OM982430 | BAG06725.1     | 22.85% | XP_019859355.1 | 24.90% |
| cytoplasmic dynein 1 intermediate chain     | OM982431 | NP_001258717.1 | 44.47% | XP_003389902.1 | 43.47% |
| cytoplasmic dynein 2 intermediate chain 1   | OM982432 | NP_001337846.1 | 31.30% | XP_011405018.2 | 32.32% |
| cytoplasmic dynein 2 intermediate chain 2   | OM982433 | AAH01614.3     | 36.06% | XP_019859258.1 | 35.47% |
| axonemal dynein intermediate chain 1        | OM982434 | NP_001268357.1 | 46.25% | XP_019850466.1 | 47.67% |
| axonemal dynein intermediate chain 2        | OM982435 | NP_075462.3    | 58.62% | XP_019851832.1 | 64.26% |
| axonemal dynein intermediate chain 3        | OM982436 | NP_660155.2    | 40.83% | XP_019861052.1 | 43.26% |
| axonemal dynein intermediate chain 4        | OM982437 | XP_024305584.1 | 33.76% | XP_019850930.1 | 38.90% |
| dynein axonemal intermediate chain 7        | OM982438 | NP_001191030.2 | 22.84% | XP_019855480.1 | 24.12% |
| thioredoxin domain-containing protein 3     | OM982439 | EAW94083.1     | 36.82% | XP_011403130.2 | 60.03% |
| cytoplasmic dynein light chain              | OM982440 | NP_542408.1    | 89.89% | XP_003384137.1 | 87.64% |
| dynein light chain roadblock-type           | OM982441 | NP_542408.1    | 89.89% | XP_003384137.1 | 87.64% |
| dynein light chain Tctex-type               | OM982442 | NP_006510.1    | 70.80% | XP_003386291.1 | 72.57% |
| dynein light chain Tctex-type protein 2B    | OM982443 | NP_689986.2    | 61.86% | XP_003389979.1 | 53.85% |
| axonemal dynein light chain 1               | OM982444 | NP_113615.2    | 67.55% | XP_003384404.1 | 70.21% |

|                                               |          |                |        |                |        |
|-----------------------------------------------|----------|----------------|--------|----------------|--------|
| axonemal dynein light chain 4                 | OM982445 | NP_005731.1    | 65.98% | XP_003386873.1 | 72.00% |
| cytoplasmic dynein 1 light intermediate chain | OM982446 | XP_016878497.1 | 42.69% | XP_019858974.1 | 40.36% |
| cytoplasmic dynein 2 light intermediate chain | OM982447 | BAD97152.1     | 43.95% | XP_019855996.1 | 48.97% |
| axonemal dynein heavy chain E                 | ON005012 | XP_011523718.1 | 21.98% | XP_019853643.1 | 31.38% |
| axonemal dynein heavy chain H                 | ON005013 | NP_001352957.1 | 60.76% | XP_019850668.1 | 68.42% |
