# Supplementary material for: Transient Interphase Microtubules Appear in Differentiating Sponge Cells
Source: MDPI journal article supplement (doi:10.3390/cells13090736), 2024-04-24
Supplement: s1 [file s1]

### **Table S1**

Accession numbers for protein sequences of genes in *H. dujardini*, mentioned in the article and accession numbers to their homologs / best blastp hits in *H. sapiens* and *A. queenslandica*.

### **Figure S1**

Alignments of  $\alpha$ -tubulin amino acid sequences of *Homo sapiens* (TUBA3C Hsap) and *Halisarca dujardini* (TUBA1-10 Hdj) with MEGA X by ClustalW. Amino acids numbering corresponds to human TUBA3C. Highlighted are conservative residues. Nucleotide binding sites are shown with blue triangles,  $\alpha/\beta$  domain interface (polypeptide binding sites) is shown with orange triangles,  $\beta/\alpha$  domain interface (polypeptide binding sites) is shown with gray triangles. Substitutions of conservative residues are shown in gray background.

### **Figure S2**

**The ratio of non-acetylated to acetylated microtubules in cultured mammalian cells.**

Immunofluorescent staining of African monkey kidney cultured cells, Vero (a,c) and COS-7 (b), with antibodies to tubulin (green) and acetylated tubulin (red). Staining by Hoechst solution is blue. Bar, 10  $\mu$ m, is the same for a,b,c and d.

- (a) The content of acetylated microtubules in neighboring cells may differ when the total number of microtubules is approximately equal
- (b) Microtubules in the primary cilium are acetylated, which allows this structure to be visualized in the cells
- (c) Acetylated tubulin of stabilized microtubules in midbody which remains after completion of mitosis

### **Video S1**

Typical cell phenotypes in a suspension of a sponge and the origin of some of them. Time indication: minutes:seconds. Bar, 20  $\mu$ m

### **Video S2**

Rapid and reversible change in the shape of the single sponge cell. Time indication: minutes:seconds. Bar, 20  $\mu$ m

### **Video S3**

Spread sponge cells not inclined to aggregates when in contact with each other. Time indication: minutes:seconds. Bar, 20  $\mu$ m
