# Supplementary material for: Transient Interphase Microtubules Appear in Differentiating Sponge Cells
Source: Cells. 2024 Apr 24;13(9):736. doi: 10.3390/cells13090736 (PMC11082956; doi:10.3390/cells13090736)
Supplement: Supplementary file 1 [file cells-13-00736-s001.zip]

Archive with 7 entries (7 files):
- Figure S1.jpg
- Figure S2.jpg
- Suppl_caption.pdf
- Table S1.pdf
- Video S1.avi
- Video S2.avi
- Video S3.avi
